# Supplementary material for: A run control framework to streamline profiling, porting, and tuning simulation runs and provenance tracking of geoscientific applications
Source: Copernicus journal article supplement (doi:10.5194/gmd-11-2875-2018), 2018-07-13
Supplement: Supplementary file 2 [file ParFlow_Code_Diary_EoCoE.xlsx]

## Sheet: Progress Sheet
		Parflow - EoCoE Code Diary
		Code developers
		WP1 HPC experts
		POP HPC experts
		Location of code on EoCoE site
		Workflow element	end of workshop 1	2016-02-29	2016-03-31	2016-06-30	2016-09-30	2016-12-31
		JUBE integration	2	2	2	2						Legend
		Benchmark definition in JUBE	0	2	2	2						0	not started
		Tools integrated in JUBE	1	2	2	2						1	in progress
		Allinea report	1	2	2	2						2	established
		Score-P profile	1	1	2	2
		Score-P trace	1	1	2	2
		Scalasca analysis	1	1	2	2
		Vampir analysis	1	1	1	2
		Extrae measurement	1	1	1	2
		Paraver analysis	1	1	1	2
		Darshan results	1	2	2	2
		VTune analysis	1	1	1	2
		Advisor analysis	0	0	1	2
		Remarks

## Sheet: Benchmark 1
		Description			Interpretation
		Job: Idealized model with Alpine domain size, ParFlow compiled with opt flag: -O3 -xCORE-AVX2 - 16875000/100000 unknowns - 48 MPI Tasks with 48 tasks per node/24 MPI Tasks with 24 tasks per node (1 node job) - IO turned on: No reading; writing out ParFlow Binary Files (pfb). - It is a development run. Looking to do this for a more realistic case with the same domain size and number of unknowns, o…			Please see detailed PoP code audit (report available on request)									1	Job: Idealized model with Alpine domain size, ParFlow compiled with opt flag: -O3 -xCORE-AVX2
															: 16875000 unknowns
															: 48 MPI Tasks with 48 tasks per node (1 node job)
															: IO turned on: No reading; writing out ParFlow Binary Files (pfb).
														2	Job: Idealized model with Alpine domain size, ParFlow compiled with opt flag: -O3 -xCORE-AVX2
															: 100000 unknowns
															: 24 MPI Tasks with 24 tasks per node (1 node job)
															: IO turned on: No reading; writing out ParFlow Binary Files (pfb).
		Platform	JURECA
		Metric number	Global level	Unit prop. MH	Tool(s) used	end of workshop 1	2016-02-29	2016-03-31	2016-06-30	2016-09-30	2016-12-31
		JOB specs					1		2
		Glob.1	Tps total elapsed	[s]			27		4.05
		Glob.2	Tps IO	[s]	darshan		1.69956		0.09
		Glob.3	Tps MPI	[s]	scorep/scan		1.33		0.57
		Glob.4	Memory vs compute bound	1 <= ratio <= 2	alinea		??	??	??
			IO
		IO.1	IO Volume	[B] or [B] / [s] = bytes per MPI Task * number of tasks?	darshan		135361728		183110000
		IO.2	Calls	[nb calls], [nb calls/s] not sure what this is?	darshan				24002518
		IO.3	Throughput	[B] / [s] =total B / total write time?	darshan		7.96452e+07		3.98226e+07
		IO.4	Individual IO access	[B] not sure what this is?	NA
			MPI
		MPI.1	P2P calls (nb)	[nb calls]	scorep/scan- visits		3510000		10850
		MPI.2	P2P calls (time)	[s]	scorep/scan		99.5		0.14
		MPI.3	Collective calls (nb)	[nb calls]	scorep/scan- visits		529000		0.01
		MPI.4	Collective calls (time)	[s]	scorep/scan		30.8		0.796
		MPI.5	Synchro / Wait	[s]	scorep/scan		0		0.35
		MPI.6	Synchro / Wait	ratio	scorep/scan		0
		MPI.7	Message size	[B]	scorep/scan		P2P 5.43e7 C 6.47e5		7090
		MPI.8	Load balancing	Ratio = imbalance / critical_path – not sure how to get this?	scorep/scan		133.11 sec (imbalance)		0.915
			Node
		Node.1	Multi-thread	Ratio = time In OpenMP region / (glob.1 – glob.2 – glob.3)	scorep/scan		NA
		Node.2	Load balancing MT	Ratio = imbalance / critical_path	scorep/scan		NA
		Node.3	Overhead & Synchro MT	Ratio = OpenMP overhead / (glob.1 – glob.2 – glob.3)	scorep/scan		NA
			Memory
		Mem.1	Memory footprint	[B]	scorep				23101500
		Mem.2	Cache usage intensity	Hit / miss in L2 – not sure what this- L2 DCM ?	NA		19500000000
		Mem.3	RAM access avg throughput	[B/s]	scorep				7671500
			CPU
		CPU.1	IPC	Instructions per cycle	NA
		CPU.2	Runtime without vectorization	[s]					3.89
		CPU.3	Vectorisation efficiency	Runtime with / without vectorization					1.04113
		CPU.4	Runtime without FMA	[s]					3.83
		CPU.5	FMA efficiency	Runtime with / without FMA FUSED MULTIPLY ADD					1.05744

## Sheet: Benchmark 2
		Description			Interpretation
		Job: PFLCLM model 12 km EuroCordex domain, with inactive areas, overland flow and climate forcing ParFlow compiled with opt flag: -O3 -xCORE-AVX2 - 184864 unknowns - 96 MPI Tasks with 24 tasks per node (4 node job) - IO turned on: Reading AND writing out ParFlow Binary Files (pfb). - It is a production run. Run for 1 timesteps with timestep = 1 hours - Too big to collect traces			Bottlenecks are: load imbalance due to inactive areas, IO read/write and post-processing overheads, main time spent is in the solver so to speed this up (accelerators/refactoring etc) would be good
		Platform	JURECA
		Metric number	Global level	Unit prop. MH	Tool(s) used	end of workshop 1	2016-02-29	2016-03-31	2016-06-30	2016-09-30	2016-12-31
		Glob.1	Tps total elapsed	[s]					96.11
		Glob.2	Tps IO	[s]	darshan				3.22
		Glob.3	Tps MPI	[s]	NA
		Glob.4	Memory vs compute bound	1 <= ratio <= 2	alinea?
			IO
		IO.1	IO Volume	[B] or [B] / [s] = bytes per MPI Task * number of tasks?	darshan				2746150000
		IO.2	Calls	[nb calls], [nb calls/s] not sure what this is?	darshan				73580234
		IO.3	Throughput	[B] / [s] =total B / total write time?	darshan
		IO.4	Individual IO access	[B] not sure what this is?	NA
			MPI
		MPI.1	P2P calls (nb)	[nb calls]	NA
		MPI.2	P2P calls (time)	[s]	NA
		MPI.3	Collective calls (nb)	[nb calls]	NA
		MPI.4	Collective calls (time)	[s]	NA
		MPI.5	Synchro / Wait	[s]	NA
		MPI.6	Synchro / Wait	ratio	NA
		MPI.7	Message size	[B]	NA
		MPI.8	Load balancing	Ratio = imbalance / critical_path – not sure how to get this?	NA
			Node
		Node.1	Multi-thread	Ratio = time In OpenMP region / (glob.1 – glob.2 – glob.3)	NA
		Node.2	Load balancing MT	Ratio = imbalance / critical_path	NA
		Node.3	Overhead & Synchro MT	Ratio = OpenMP overhead / (glob.1 – glob.2 – glob.3)	NA
			Memory
		Mem.1	Memory footprint	[B]	scorep				46243000
		Mem.2	Cache usage intensity	Hit / miss in L2 – not sure what this- L2 DCM ?	NA
		Mem.3	RAM access avg throughput	[B/s]	scorep				34524500
			CPU
		CPU.1	IPC	Instructions per cycle	NA				1
		CPU.2	Runtime without vectorization	[s]					97.23
		CPU.3	Vectorisation efficiency	Runtime with / without vectorization					0.988481
		CPU.4	Runtime without FMA	[s]					95.75
		CPU.5	FMA efficiency	Runtime with / without FMA FUSED MULTIPLY ADD					1.00376
