# Supplementary material for: A run control framework to streamline profiling, porting, and tuning simulation runs and provenance tracking of geoscientific applications
Source: Copernicus journal article supplement (doi:10.5194/gmd-11-2875-2018), 2018-07-13
Supplement: Supplementary file [file gmd-11-2875-2018-supplement-title-page.pdf › gmd-11-2875-2018-supplement-title-page.pdf]

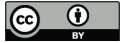

## *Supplement of*

# **A run control framework to streamline profiling, porting, and tuning simulation runs and provenance tracking of geoscientific applications**

Wendy Sharples et al.

*Correspondence to:* Wendy Sharples ([w.sharples@fz-juelich.de](mailto:w.sharples@fz-juelich.de))

- `gmd-11-2875-2018-supplement-title-page.pdf`
- `parFlow_EoCoE_GMD`
  - `.gitignore`
  - `LICENCE.rst`
  - `ParFlowInstall.ksh`
  - `ParFlow_Code_Diary_EoCoE.xlsx`
  - `README.rst`
  - `cleaner.ksh`
  - `custom`
    - \* `strongScalingIdealised2MPI_Job_Juqueen.xml`
    - \* `strongScalingIdealised_Job_Jureca.xml`
    - \* `weakScalingIdealised_Job_Julia.xml`
    - \* `weakScalingIdealised_Job_Juqueen.xml`
    - \* `weakScalingIdealised_Job_Jureca.xml`
    - \* `weakScalingIdealised_Job_Jureca_DownloadSrc.xml`
  - `doc`
    - \* `ParFlow.manual.r693_2014-07-28.pdf`
    - \* `ParFlow_POP_audit.pdf`
    - \* `README_120515.rst`
    - \* `cookbook.rst`
  - `driver`
    - \* `ParFlowRC_Base.xml`
    - \* `ParFlowRC_Benchmark.xml`
    - \* `ParFlowRC_Postprocess.xml`
    - \* `ParFlowRC_Preprocess.xml`
  - `eocoe_benchmarking`

- \* BenchmarkScriptCheckOutputv320.xml
- \* BenchmarkScriptStrongScalingr693.xml
- \* BenchmarkScriptStrongScalingv320.xml
- \* BenchmarkScriptWeakScalingr693.xml
- \* BenchmarkScriptWeakScalingv320.xml
- \* README
- \* compilation\_script.ksh
- \* compilation\_step.xml
- \* execution\_step\_Europe.xml
- \* execution\_step\_Ideal.xml
- \* externalfiles
- \* jube-parse.log
- \* metrics\_10.json
- \* perf\_eval
- \* runme\_Europe.xml
- \* runme\_Ideal.xml
- \* src
- funcs.py
- funcs.pyc
- jubeResult\_script.py
- jubeRun\_script.py
- julia\_files
  - \* ParFlowInstall\_julia.ksh
  - \* env\_julia.ini
  - \* julia\_submit.job.in
  - \* tsmp\_slm\_run.bsh
- juqueen\_files
  - \* ParFlowInstall\_juqueen.ksh
  - \* env\_juqueen.ini
  - \* juqueen\_ChainJob\_Script.sh.in
  - \* juqueen\_submit.job.in
  - \* parflow\_patch
- jureca\_files
  - \* ParFlowInstall\_jureca.ksh
  - \* env\_jureca.ini
  - \* env\_jureca.ini2015b
  - \* env\_jureca.ini2016a
  - \* jureca\_ChainJob\_Script.sh.in
  - \* jureca\_chainJobs.sh
  - \* jureca\_submit.job.in
  - \* jureca\_submit\_largemem.job.in
  - \* preprocessing
- juropa\_files
  - \* ParFlowInstall\_juropa.ksh
  - \* env\_juropa.ini
  - \* juropa\_ChainJob\_Script.sh.in

- \* juropa\_chainJobs.sh
- \* juropa\_submit.job.in
- \* juropa\_submit\_largemem.job.in
- \* preprocessing
- model
  - \* debugging\_tools
  - \* dist
  - \* postprocessing\_scripts
  - \* terrain.sine.tcl
- profiler\_data
  - \* darshan
  - \* extrae
  - \* juqueen\_memusage
  - \* papi
  - \* scorep
- src
  - \* ParFlow.r693.tar.gz
  - \* pf\_pfm\_octree.c
- templates
  - \* ParFlow\_model\_input.xml
  - \* platform.xml
  - \* postprocess.xml
  - \* preprocess.xml
  - \* profiler.xml
  - \* romio.hints
  - \* scaling.xml

The copyright of individual parts of the supplement might differ from the CC BY 4.0 License.
